# Supplementary material for: Development of a CRISPR-SaCas9 system for projection- and function-specific gene editing in the rat brain
Source: PubMed Central journal article supplement — Sci Adv. 2020 Mar 18;6(12):eaay6687. doi: 10.1126/sciadv.aay6687 (PMC7080442; doi:10.1126/sciadv.aay6687), 2020-03-18
Supplement: aay6687_SM.pdf [file aay6687_SM.pdf]

## Supplementary Materials for

### Development of a CRISPR-SaCas9 system for projection- and function-specific gene editing in the rat brain

Haojie Sun, Su Fu, Shuang Cui, Xiangsha Yin, Xiaoyan Sun, Xuetao Qi, Kun Cui, Jiaxin Wang, Longyu Ma, Feng-Yu Liu, Fei-Fei Liao, Xin-Hong Wang, Ming Yi\*, You Wan\*

\*Corresponding author. Email: ywan@hsc.pku.edu.cn (Y.W.); mingyi@bjmu.edu.cn (M.Y.)

Published 18 March 2020, *Sci. Adv.* **6**, eaay6687 (2020)  
DOI: 10.1126/sciadv.aay6687

#### This PDF file includes:

- Fig. S1. SaCas9 inactivates the *p300* gene in vitro with high efficiency.
- Fig. S2. Neuronal specificity for spine density analysis.
- Fig. S3. Amygdala-projecting IL neurons are activated during extinction.
- Table S1. gRNA sequences targeting *cbp* gene or *p300* gene.
- Table S2. AAV vectors used.
- Table S3. Primer sequences for T7 endonuclease assays.
- Table S4. Primer sequences for off-target analysis.

## Supplementary Materials

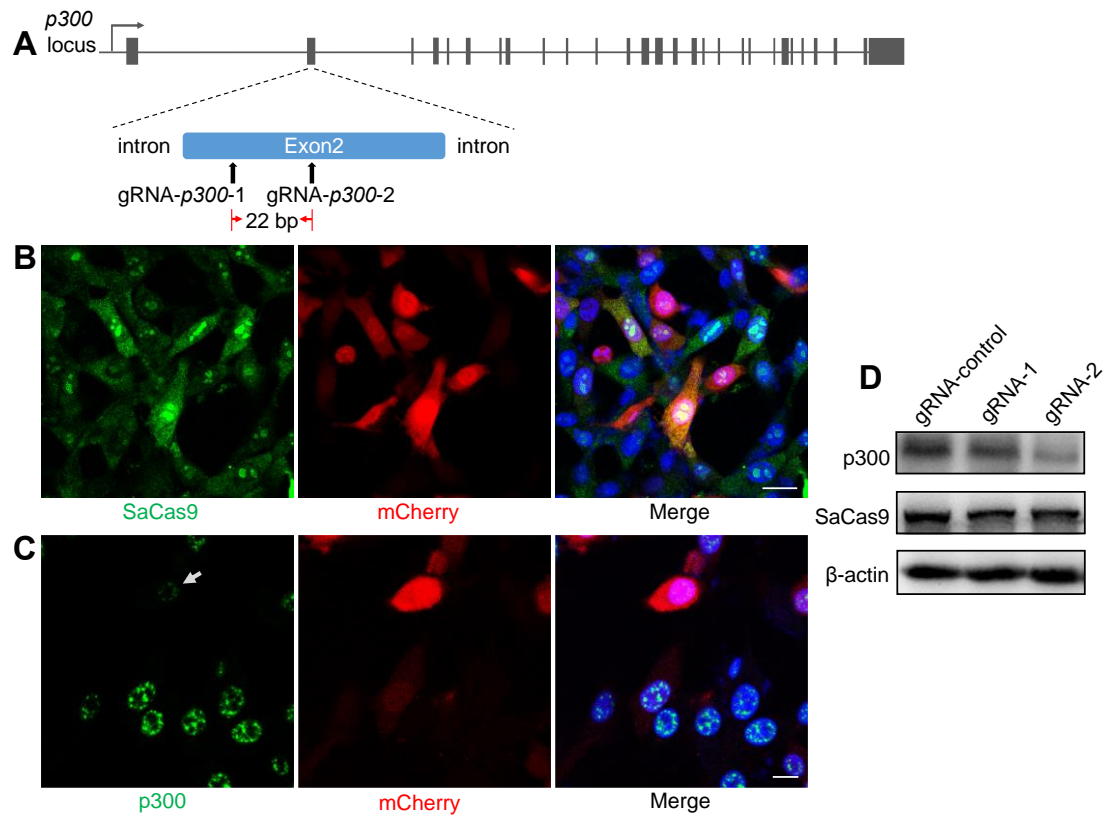

**Fig. S1. SaCas9 inactivates the *p300* gene in vitro with high efficiency.**

(A) Graphical representation of the rat *p300* gene locus showing gRNA target sites.

(B) Elevated expression of SaCas9 shown by immunofluorescence three days after lentivirus transfection in F98 cells. Scale bars, 20  $\mu$ m. (C) Immunofluorescent

staining of p300 one week after CRISPR-SaCas9 targeting of *p300* locus in F98 cells, with white arrows indicating decreased p300 expression in SaCas9- and

gRNA-positive cells. Scale bars, 10  $\mu$ m. (D) Western blot analysis showing decreased p300 expression in F98 cells one week after lentivirus transfection.

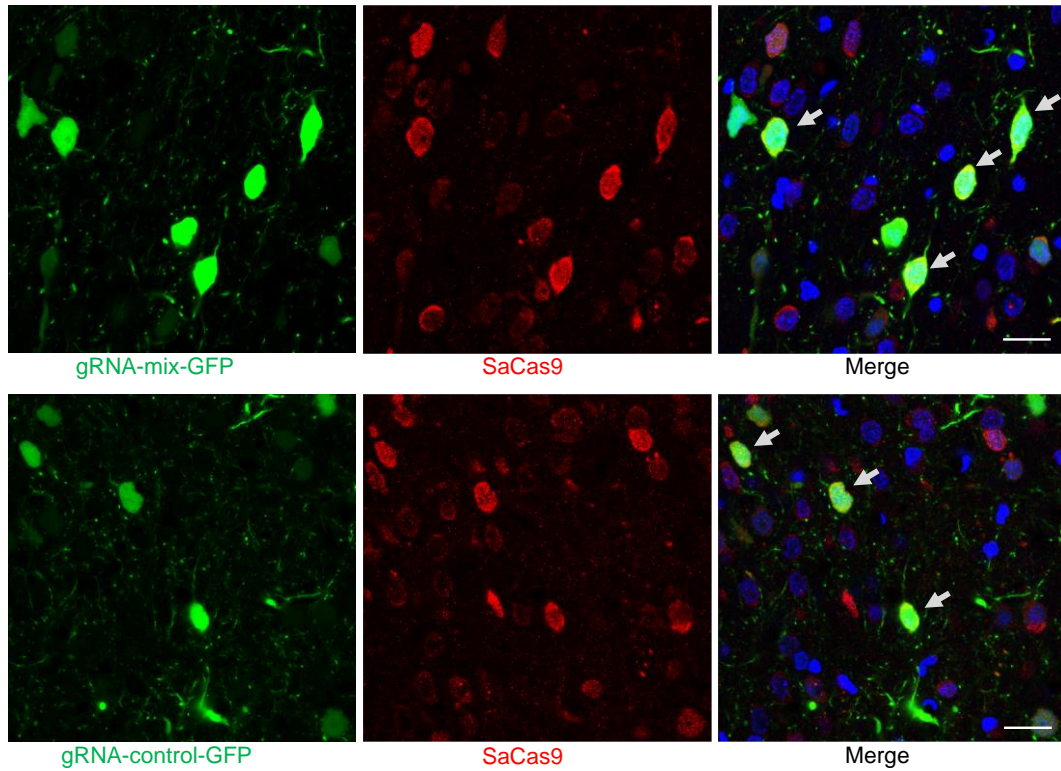

**Fig. S2. Neuronal specificity for spine density analysis.** The presence of SaCas9 in gRNA-mix-GFP<sup>+</sup> (upper) and gRNA-control-GFP<sup>+</sup> (lower) neurons for morphology analysis was verified by immunofluorescence. Scale bars, 20  $\mu$ m.

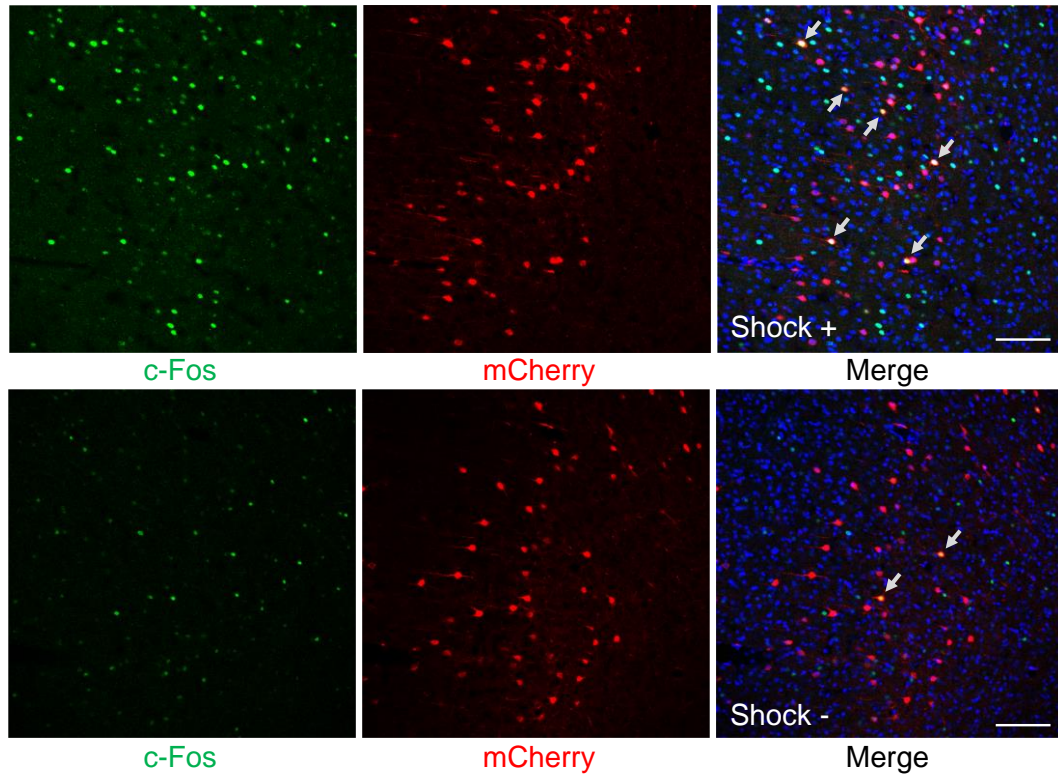

**Fig. S3. Amygdala-projecting IL neurons are activated during extinction.** Illustration of amygdala-projecting IL neurons (mCherry<sup>+</sup>) co-labeled with c-Fos 2 h after context exposure in the shock + (with shock during CFC training) and shock - (without shock during CFC training) groups. Scale bars, 100  $\mu$ m.

**Table S1. gRNA sequences targeting *cbp* gene or *p300* gene.**

|              | gRNA sequence         | PAM    | Exon | Direction |
|--------------|-----------------------|--------|------|-----------|
| gRNA-control | GGAGACGAATAATGCGTCTCC | /      | /    | /         |
| CBP-gRNA-1   | CTGGCTGCCTGTTTGGGCAGG | CTGGGT | 2    | -         |
| CBP-gRNA-2   | AAATGTCAGCGACGAGAGCAA | GCGAAT | 4    | +         |
| CBP-gRNA-3   | AGCAGCTGTGGAAGCAGGAGG | TGGAGT | 14   | -         |
| CBP-gRNA-4   | ATTCAGTGCTTGGGAGGCAGG | GGGAGT | 2    | -         |
| CBP-gRNA-5   | AGTAACTCTGGCCATAGCTTA | ATGAAT | 2    | +         |
| p300-gRNA-1  | TAGTTCCCCCAACCTCAATAT | GGGAGT | 2    | +         |
| p300-gRNA-2  | GTTATGGCCAGCCAGGCCCAA | CAGAAT | 2    | +         |

**Table S2. AAV vectors used.**

| AAV                                       | Titer<br>(v.g./ml)   | Serotype |
|-------------------------------------------|----------------------|----------|
| AAV-hSyn-GFP                              | $9.3 \times 10^{12}$ | 9        |
| AAV-CaMKII-Cre                            | $8.1 \times 10^{13}$ | 1        |
| AAV-CaMKII-Cre-P2A-GFP                    | $5.2 \times 10^{13}$ | 1        |
| AAV-hSyn-Cre-P2A-GFP                      | $4.5 \times 10^{13}$ | 1        |
| AAV-hSyn-DIO-mCherry                      | $1.8 \times 10^{13}$ | 9        |
| AAV-hSyn-Cre                              | $6.7 \times 10^{13}$ | retro    |
| AAV-hSyn-Cre-P2A-GFP                      | $1.7 \times 10^{13}$ | retro    |
| AAV-hSyn-mCherry                          | $5.4 \times 10^{13}$ | retro    |
| AAV-hSyn-DIO-SaCas9-3×flag                | $3.3 \times 10^{13}$ | 9        |
| AAV-hSyn-SaCas9-3×flag                    | $4.1 \times 10^{13}$ | 9        |
| AAV-U6-gRNA1-U6-gRNA4-U6-gRNA5-CMV-GFP    | $1.2 \times 10^{13}$ | 9        |
| AAV-c-fos-rtTA-U6-gRNA1-U6-gRNA4-U6-gRNA5 | $1.7 \times 10^{13}$ | 9        |
| AAV-c-fos-rtTA                            | $3.7 \times 10^{13}$ | 9        |
| AAV-TRE <sup>3G</sup> -SaCas9-3×flag      | $2.2 \times 10^{13}$ | 9        |
| AAV-TRE <sup>3G</sup> -DIO-SaCas9-3×flag  | $3.2 \times 10^{13}$ | 9        |

**Table S3. Primer sequences for T7 endonuclease assays.**

|          |                        |
|----------|------------------------|
| gRNA-1-F | GATTTTGGATCATTGTT      |
| gRNA-1-R | CCTGTGTCAAAGTCTCA      |
| gRNA-2-F | GCTGGTGCTGTTTCTGG      |
| gRNA-2-R | CAAATCACCTGCCTTCT      |
| gRNA-3-F | TAAGGTGCCCTGTATGA      |
| gRNA-3-R | GTCGGTAAACTAAGTAAATGTG |

|              |                      |
|--------------|----------------------|
| gRNA-4-F     | TGTGCCGTATTCAGTCC    |
| gRNA-4-R     | CTGCGTCCAAACATAAAC   |
| gRNA-5-F     | CCAGATGCTGCGTCCAA    |
| gRNA-5-R     | CAACAACCCGTTTCTTTC   |
| gRNA-1+4+5-F | CGGGATAGGCAATGTG     |
| gRNA-1+4+5-R | CTGGAGCAGGGTAGGGCATT |

**Table S4. Primer sequences for off-target analysis.**

|                 |                       |
|-----------------|-----------------------|
| gRNA-1-F        | CTGTGATGTGGCAGGACTAC  |
| gRNA-1-R        | CGGGATAGGCAATGTG      |
| off-target 1-F  | TTGCTTCAGACTCCACATTG  |
| off-target 1-R  | TGAAGAACTTGAGAAGAAGGG |
| off-target 2-F  | AATTATGTCCCACCCAATGA  |
| off-target 2-R  | AGACTGATTTTCCCCTAAG   |
| off-target 3-F  | GCCCCTTAAATCGAACTC    |
| off-target 3-R  | TCACCCGAGACCATGTAGAG  |
| off-target 4-F  | ACGTTAAGAGATGGCATCTG  |
| off-target 4-R  | AGTTTGCACATCATAGCCAA  |
| off-target 5-F  | AGTTAAAAACCAAGGCAC    |
| off-target 5-R  | TCAGTTTGATTTAGTCGC    |
| off-target 6-F  | TGTTCTGCTAAACTCGAGGC  |
| off-target 6-R  | AAGAAGTCAGGCGTGCT     |
| off-target 7-F  | ACAGCATGACACCGTGTGAG  |
| off-target 7-R  | GGAAAGGAAGGCAGGTAGAC  |
| off-target 8-F  | CAGAAAGGAAGTCAGGGTAT  |
| off-target 8-R  | AACAGCAGCATTAGCCA     |
| off-target 9-F  | TTCTGTGTTGGCATGGTATT  |
| off-target 9-R  | TGTTTTTCGTGGAGCTATTCA |
| gRNA-4-F        | AAGCTATGGCCAGAGTTACT  |
| gRNA-4-R        | GCATGGCCAGTTTAGG      |
| off-target 10-F | AAGCCACTGCCTTGTATTCC  |
| off-target 10-R | CAATGAGCAGTTGGTTCCC   |
| off-target 11-F | GGGACCATGGAAAGCATTGA  |
| off-target 11-R | GCCCTGAGTCTAGAGCATGT  |
| off-target 12-F | AAAATGGAGCATACTTAGAG  |
| off-target 12-R | CCAACATCATGCAAAGTGTC  |
| off-target 13-F | TGATAACCTACTTCCCTAAC  |
| off-target 13-R | GCGAAACAGTAAGGACT     |
| off-target 14-F | CCAAATTTAAAATCCAGTTAG |
| off-target 14-R | GATGACCTGGAAGTCTT     |
| off-target 15-F | CTTCCCAAAGAGCAGATTAG  |
| off-target 15-R | GAGGCACATTTAAGTCCC    |

|                 |                        |
|-----------------|------------------------|
| off-target 16-F | GCTGAAACAGTATAAGTCGG   |
| off-target 16-R | GCCTGCTATTTAAGACCTT    |
| off-target 17-F | GGACCGTTCCTTCAGACC     |
| off-target 17-R | ACCGATAATCCCAGCTCTAC   |
| off-target 18-F | TTAAAGGGTTGCAGCGTTAG   |
| off-target 18-R | TGGTTAAGTGGGGAATGTC    |
| off-target 19-F | CCCTTGAGTTATTGTTGAG    |
| off-target 19-R | CACCAAAGGTTCTGGTTAGA   |
| off-target 20-F | GTCTGTGAGACATACCCTGAGG |
| off-target 20-R | ATGTGCAGGCAGCCATTCAC   |
| off-target 21-F | AAAACAAGACAACCTTGGC    |
| off-target 21-R | TTAGCAAGACTACACGGAGA   |
| off-target 22-F | TCCAATCTGAGGGGAGTGTA   |
| off-target 22-R | TCCCATTTCCAATGATTCAC   |
| off-target 23-F | ACGATATTAAGGTGGTTAG    |
| off-target 23-R | TGTTAGGACTCCCACATAA    |
| off-target 24-F | AGACTAGCCTCAAACCTCAT   |
| off-target 24-R | ATAAAGTGATTCAGGACTC    |
| off-target 25-F | CGGCCAATGGATGCTA       |
| off-target 25-R | GTCCTCCCCACTTGATCACT   |
| off-target 26-F | AATTAAGAGAAAAGAACCAC   |
| off-target 26-R | ATGGTTTAAATTTAGCAAT    |
| off-target 27-F | CTCGTCAATAAAAAGACAGTA  |
| off-target 27-R | AGAAGAGGAAAATCTCAT     |
| off-target 28-F | AAGGGTAAGAACTTCC       |
| off-target 28-R | AAAACTAAAGGTAACATTTG   |
| off-target 29-F | CTACCAGCTGGAAATCCTC    |
| off-target 29-R | ACTGCTGGAGTGAGCTCTTG   |
| gRNA-5-F        | AAGCACTGAATCCGCAAGC    |
| gRNA-5-R        | CTGGAGCAGGGTAGGGCATT   |
| off-target 30-F | TCCACCTTCCTGTGAACCC    |
| off-target 30-R | AATTCTAGAGGCTGATATCTGC |
| off-target 31-F | TAGGGCTTCATACTTGC      |
| off-target 31-R | AGAAAAGTGTGGGACCCTAT   |
| off-target 32-F | GATGGGTGAGGAAGGTGATA   |
| off-target 32-R | GGCTTCTGCTCTATGGC      |
| off-target 33-F | AGATGGCACAACCTACTCACCT |
| off-target 33-R | TTGGGTTCCATCCCTAGTAC   |
